# Supplementary material
Source: HighWire-hosted journal article supplement (doi:10.1101/rna.052340.115)
Supplement: SuppTable1.xlsx [file SuppTable1.xlsx]

## Sheet: Sheet1
Supplementary Table 1: List of common contaminants detected by LC-MS/MS of MRB8620-PTP purifications.
OK	Accession	Entry	Description	mW (Da)	pI (pH)	PLGS Score	Peptides	Theoretical Peptides	Coverage (%)	Precursor RMS Mass Error (ppm)	Products	Modified Peptides	Products RMS Mass Error (ppm)	Products RMS RT Error (min)	Protein ID
2	P00330	ADH1_YEAST	Alcohol dehydrogenase I EC 1 1 1 1	36668	6.2734	796.92	16	24	49.5677	5.5542	166	1	12.198	0.0209	2261
2	P04264	K2C1_HUMAN	Keratin type II cytoskeletal 1 Cytokeratin 1 K	65846	8.2736	440.434	11	45	15.3966	3.7636	73	0	13.2004	0.0232	39761
2	P13645	K1CJ_HUMAN	Keratin type I cytoskeletal 10 Cytokeratin 10	59482	4.9506	249.799	8	34	12.1417	3.5382	42	0	16.3469	0.0333	39712
2	P49383	ADH2_KLULA	Alcohol dehydrogenase II EC 1 1 1 1	37073	5.3474	225.311	5	31	12.6437	4.6069	40	0	12.97	0.0219	2280
2	P35908	K22E_HUMAN	Keratin type II cytoskeletal 2 epidermal Cytoker	65825	8.053	193.392	4	55	6.8217	3.0497	34	0	10.655	0.0273	39759
2	P56247	CDN2_LITGI	Caeridin 2	1408	3.1002	70.3584	1	1	100	9.2646	10	0	11.6999	0.0437	11102
2	P00331	ADH2_YEAST	Alcohol dehydrogenase II EC 1 1 1 1	36577	6.2743	334	6	25	21.0375	4.4669	62	0	11.284	0.0205	2289
2	P35527	K1CI_HUMAN	Keratin type I cytoskeletal 9 Cytokeratin 9 K9	61949	4.9574	243.247	5	39	16.2379	3.7734	31	2	11.3692	0.0393	39710
2	Q9P4C2	ADH2_KLUMA	Alcohol dehydrogenase II EC 1 1 1 1	36813	5.634	143.161	5	26	13.5447	7.4423	48	0	12.0562	0.0232	2281
2	P20369	ADH1_KLULA	Alcohol dehydrogenase I EC 1 1 1 1	37236	5.7019	255.536	5	26	12	3.7764	46	0	10.9983	0.0192	2246
2	P00761	TRYP_PIG	Trypsin precursor EC 3 4 21 4	24393	6.9139	99.3366	2	14	7.7922	6.6202	30	0	12.7112	0.0259	81863
2	P48669	K2CF_HUMAN	Keratin type II cytoskeletal 6F Cytokeratin 6F	59899	8.0537	126.914	2	43	3.3748	2.7296	15	0	8.046	0.0264	39786
2	P55815	YCCA_BACP3	Hypothetical protein in CCCA 5 region Fragment	16383	5.8735	77.6778	1	8	8.6667	0.0856	11	0	15.2695	0.0409	95771
2	P04264	K2C1_HUMAN	Keratin type II cytoskeletal 1 Cytokeratin 1 K	65846	8.2736	681.441	14	45	21.1509	3.7909	106	0	11.7886	0.024	39761
2	Q9Z8M0	RBFA_CHLPN	Ribosome binding factor A	13963	9.6119	82.7301	2	10	16.6667	6.1907	8	0	12.6908	0.0231	63362
2	Q03845	FLHA_CAUCR	Flagellar biosynthesis protein flhA	74481	5.1751	65.038	2	48	4.7143	4.3769	11	0	12.1781	0.0317	26141
2	P02533	K1CN_HUMAN	Keratin type I cytoskeletal 14 Cytokeratin 14	51458	4.8973	134.403	2	42	3.397	2.9707	14	0	12.4413	0.0169	39720
