# Supplementary material
Source: HighWire-hosted journal article supplement (doi:10.1101/rna.052340.115)
Supplement: SuppTable2.docx [file SuppTable2.docx]

Supplementary Table 2: Summary of oligonucleotides developed in this study

| Purpose | Name | Oligonucleotide Primer Sequence | Notes |
| --- | --- | --- | --- |
| PTP tag | 8620_pCPTPPURO_Fwd | 5‘-GCAGGGCCCCATTTGAGTTCCTACCGTCATTT-3‘ | ApaI underlined |
| PTP tag | 8620_pCPTPPURO_Rev | 5‘-GCAGCGGCCGCTTACCACCATCTTGCGACAACCG -3‘ | NotI underlined |
| RNAi | 8620_RNAi_Fwd | 5’-GGATCCTGCAGTCACTGGCTCATTTC-3’ | BamHI underlined; primer II F |
| RNAi | 8620_RNAi_Rev | 5’-CTCGAGTTGCTACACTCACCGTCAGC -3’ | XhoI underlined |
| qPCR | 8620_qPCR_Fwd | 5’-AAGTTGAAACACCCGCAGAC-3’ |  |
| qPCR | 8620_qPCR_Rev | 5’-GAACCGCTTCACGAGCTATC-3’ | primer II R |
| YFP tag | 3010_pEYFPPURO_Fwd | 5’-GGTACCAGTACGTCGATCAAATGAATGCCGA-3’ | HindIII underlined |
| YFP tag | 3010_pEYFPPURO_Rev | 5’-AGATCTTGCCTGCGGTGTAGACCCA-3’ | BglII underlined |
| qPCR | CYB_unedited_Fwd | 5’-GAGGAATCTTGAGTTATAGTAGATACAC-3’ |  |
| qPCR | CYB_unedited_Rev | 5’-AAACTTATCTGGGATTGCCTTT-3’ |  |
| KO | A-5U8620-F | 5’-AGGGTTCCATATACGTGTG-3’ | primer I F |
| KO | B-3U8620-R | 5’-TCGCTTGTACCCCACGAAC-3’ | primer I R |
| KO | B-3U8620-Hyg-F | 5’-GTCCGAGGGCAAAGGAATAGCGGACTACAGATTAGTATTGC-3’ |  |
| KO | A-5U8620-Hyg-R | 5’-GGTGAGTTCAGGCTTTTTCATCACGCCGCAGAAAATATGC-3’ |  |
| KO | B-3U8620-Ble-F | 5’-GTGGCCGAGGAGCAGGACTGACGGACTACAGATTAGTATTGC-3’ |  |
| KO | A-5U8620-Ble-R | 5’-GCACTGGTCAACTTGGCCATCACGCCGCAGAAAATATGC-3’ |  |
| KO | D-Nest-5Let-F | 5’-GGAGCGGCCACCAGC-3’ |  |
| KO | D-Nest-5Let-R | 5’-CAACAATGTTTCCAGTTTCATG-3’ |  |
| gRNA probe | gCoIII[147] | 5’-TAATTAAATCTTCTCATTGTCACTGTCTTATACTACGATTGAGTTTGTAT-3’ |  |
| gRNA probe | gA6[14] | 5’-ATAATTATCATATCACTGTCAAAATCTGATTCGTTATCGGAGTTATAGTATAT-3’ |  |
| gRNA probe | gMURF[II] | 5’-CATTCAATTACTCTAATTTAATTTTATTTTTGTGC-3’ |  |
| 5.8S rRNA probe |  | 5’-CCATCGCGACACGTTGTGGGAGCCG-3’ | Loading control for gRNA Northern blots |
